# Supplementary material for: CGRP sensory neurons promote tissue healing via neutrophils and macrophages
Source: PubMed Central journal article supplement (PMC11023938; doi:10.1038/s41586-024-07237-y), 2024-03-27
Supplement: 41586_2024_7237_MOESM1_ESM.pdf [file 41586_2024_7237_MOESM1_ESM.pdf]

---

**Supplementary information**

---

**CGRP sensory neurons promote tissue healing via neutrophils and macrophages**

---

In the format provided by the authors and unedited

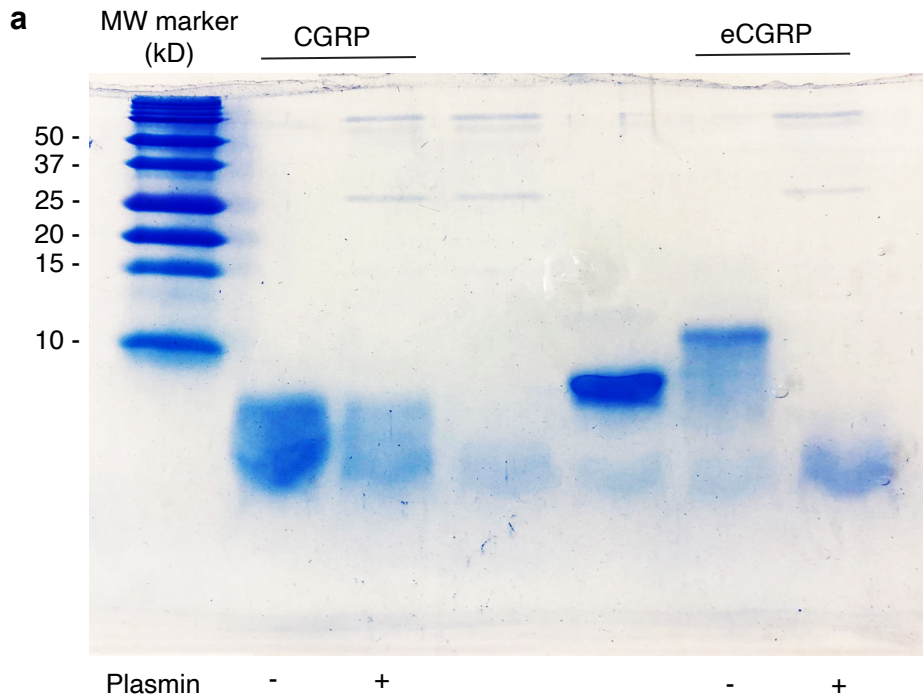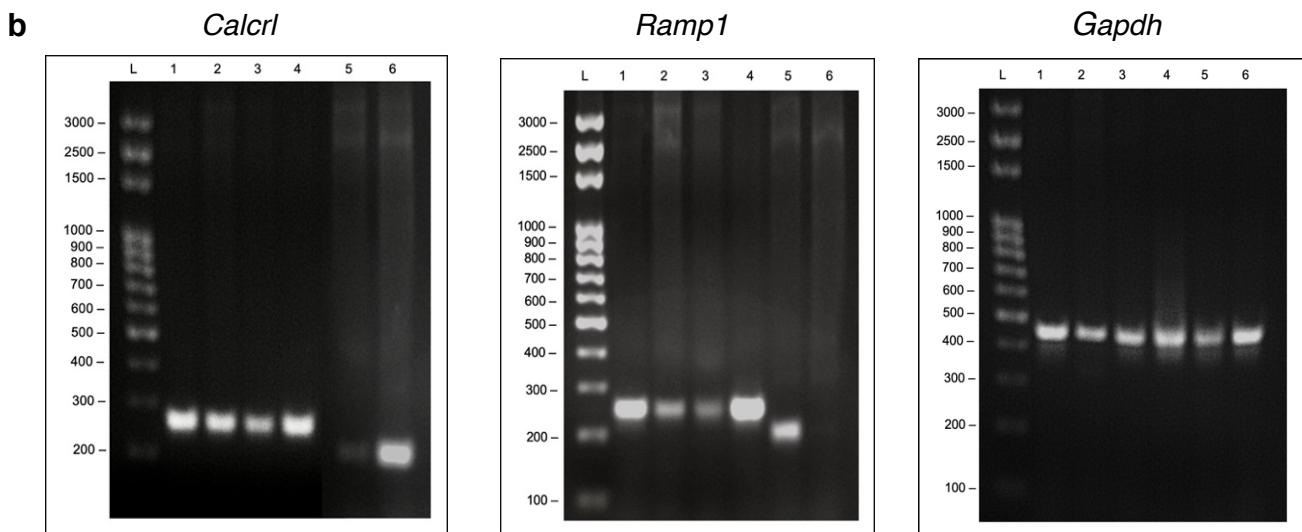

- L: Ladder
- Lane 1: Macrophages
- Lane 2: Fibroblasts
- Lane 3: Myoblasts
- Lane 4: Neutrophils
- Lane 5: Keratinocytes
- Lane 6: Endothelial cells
